# Supplementary material for: Anti-Gb3 Monoclonal Antibody Inhibits Angiogenesis and Tumor Development
Source: PubMed Central journal article supplement (PMC3506626; doi:10.1371/journal.pone.0045423), 2012-11-26
Supplement: pone.0045423.s002.pdf [file pone.0045423.s002.pdf]

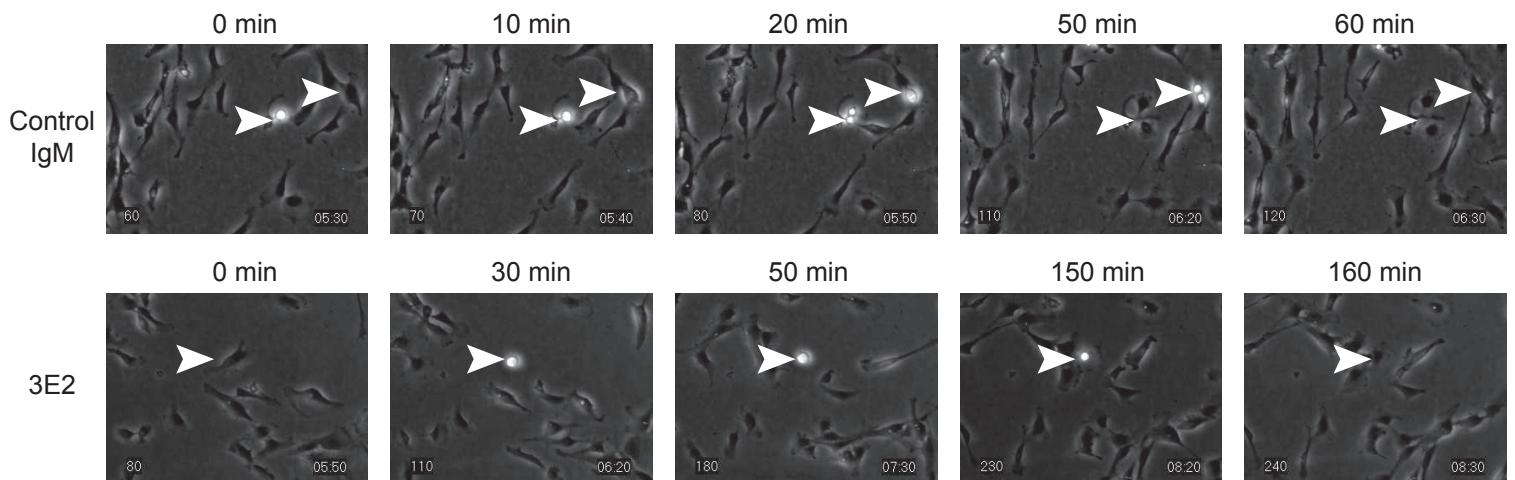

Figure S2: Increased division time in 3E2-treated endothelial cells. Photographs of HMEC-1 cell division after IgM or 3E2 treatment using 20x magnification. Arrow heads shows dividing cells.
