# Supplementary material for: Anti-Gb3 Monoclonal Antibody Inhibits Angiogenesis and Tumor Development
Source: PubMed Central journal article supplement (PMC3506626; doi:10.1371/journal.pone.0045423), 2012-11-26
Supplement: pone.0045423.s004.pdf [file pone.0045423.s004.pdf]

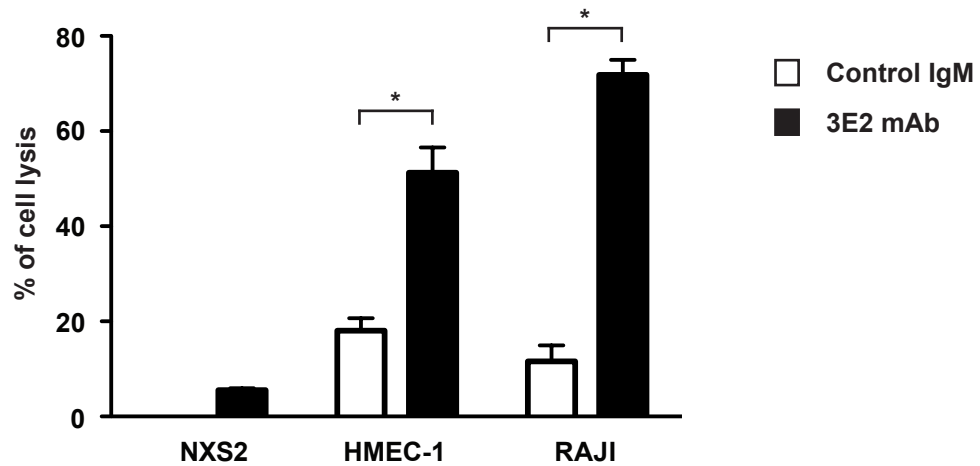

Figure S4: 3E2 induces a complement dependent cytotoxicity in HMEC-1 and RAJI Gb3-positive cells, but not in NXS2 Gb3-negative cells. CDC was measured as the % of cell lysis induced by the 10  $\mu\text{g/ml}$  of 3E2 with human serum for 2h. Specific lysis was determined by FACS using propidium iodide (n=3; mean $\pm$ SEM; \*p<0,05).
